# Supplementary material for: Systematic evaluation of colorectal cancer organoid system by single-cell RNA-Seq analysis
Source: PubMed Central journal article supplement (PMC9047329; doi:10.1186/s13059-022-02673-3), 2022-04-28
Supplement: 13059_2022_2673_MOESM1_ESM.pdf [file 13059_2022_2673_MOESM1_ESM.pdf]

## **Supplementary Information for**

### **Systematic evaluation of colorectal cancer organoid system by single-cell RNA-Seq analysis**

**This file includes:**

#### **Additional file 1: Supplementary Figures**

**Fig. S1** Overview of sample collection and establishment of colorectal cancer organoid cultures.

**Fig. S2** Tumor organoid cells and normal organoid cells that cultured in conditioned medium express different WNT signaling pathway target genes.

**Fig. S3** Mitochondrial mutations of patients #2 and #3.

**Fig. S4** Copy number variations of patient #1, #5 and #6 that were inferred by scRNA-seq data.

**Fig. S5** Whole exome sequencing of organoids that cultured in chemical-defined and conditioned media.

**Fig. S6** *In vitro* cultured organoids can maintain *in vivo* point mutations and CNVs of cancer cells.

**Fig. S7** Cultured organoids tend to enrich for specific molecular features.

**Fig. S8** Copy number variations of patient #4 and #7 that were inferred by scRNA-Seq data.

**Additional file 2: Table. S1** Basic information of patients we collected, including pathological information, sequencing technology and culture information.

**Additional file 3: Table. S2** UMAP clustering result of all single cells we analyzed.

**Additional file 4: Table. S3** DEGs of *in vivo* normal and tumor epithelial cells and basic information of some DEGs and marker genes

**Additional file 5: Table. S4** Summary table for genomic and epigenomic sequencing data, including WGS, WES and PBAT (DNA methylome) data

Fig S1

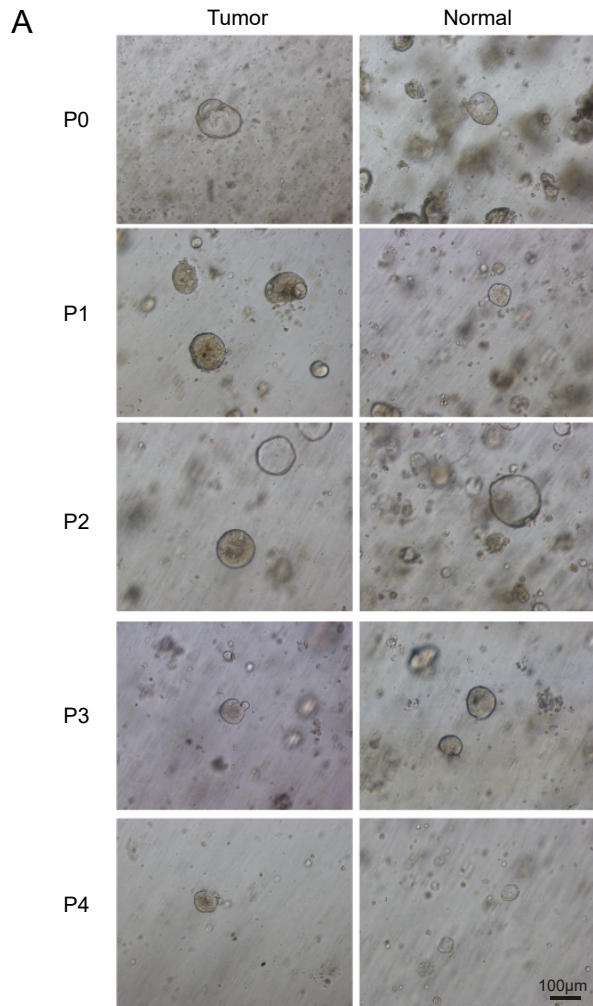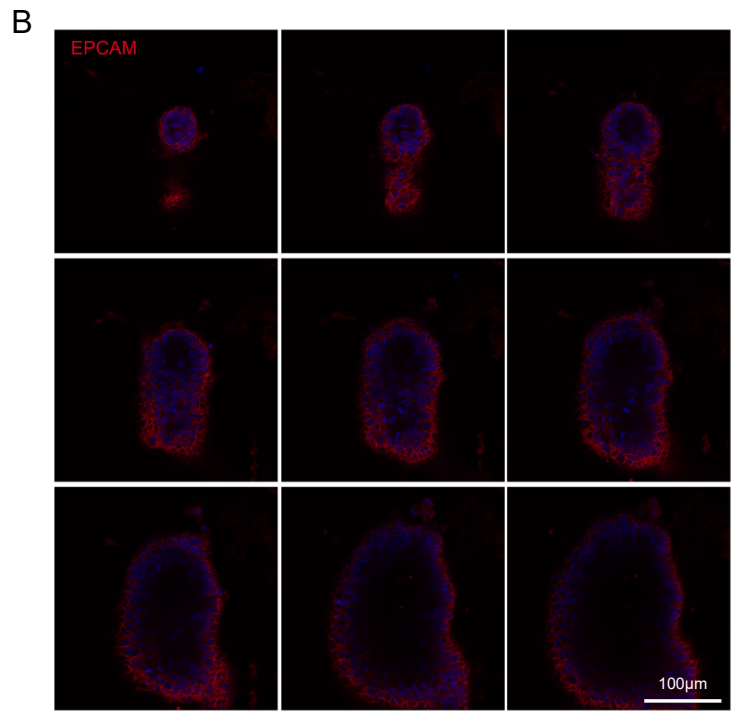

**Fig. S1 Overview of sample collection and establishment of colorectal cancer organoid cultures.**

- (A) Representative bright-field images of tumor- and paired adjacent normal tissue-derived organoids of the patient from different passages. All scale bars, 100  $\mu\text{m}$ . "P" stands for passage.
- (B) Whole-mount immunofluorescent staining of EPCAM on normal tissue-derived organoids. Series of Z-axis optical sections are shown from left to right and from up to down. All scale bar, 100  $\mu\text{m}$ .

Fig. S2

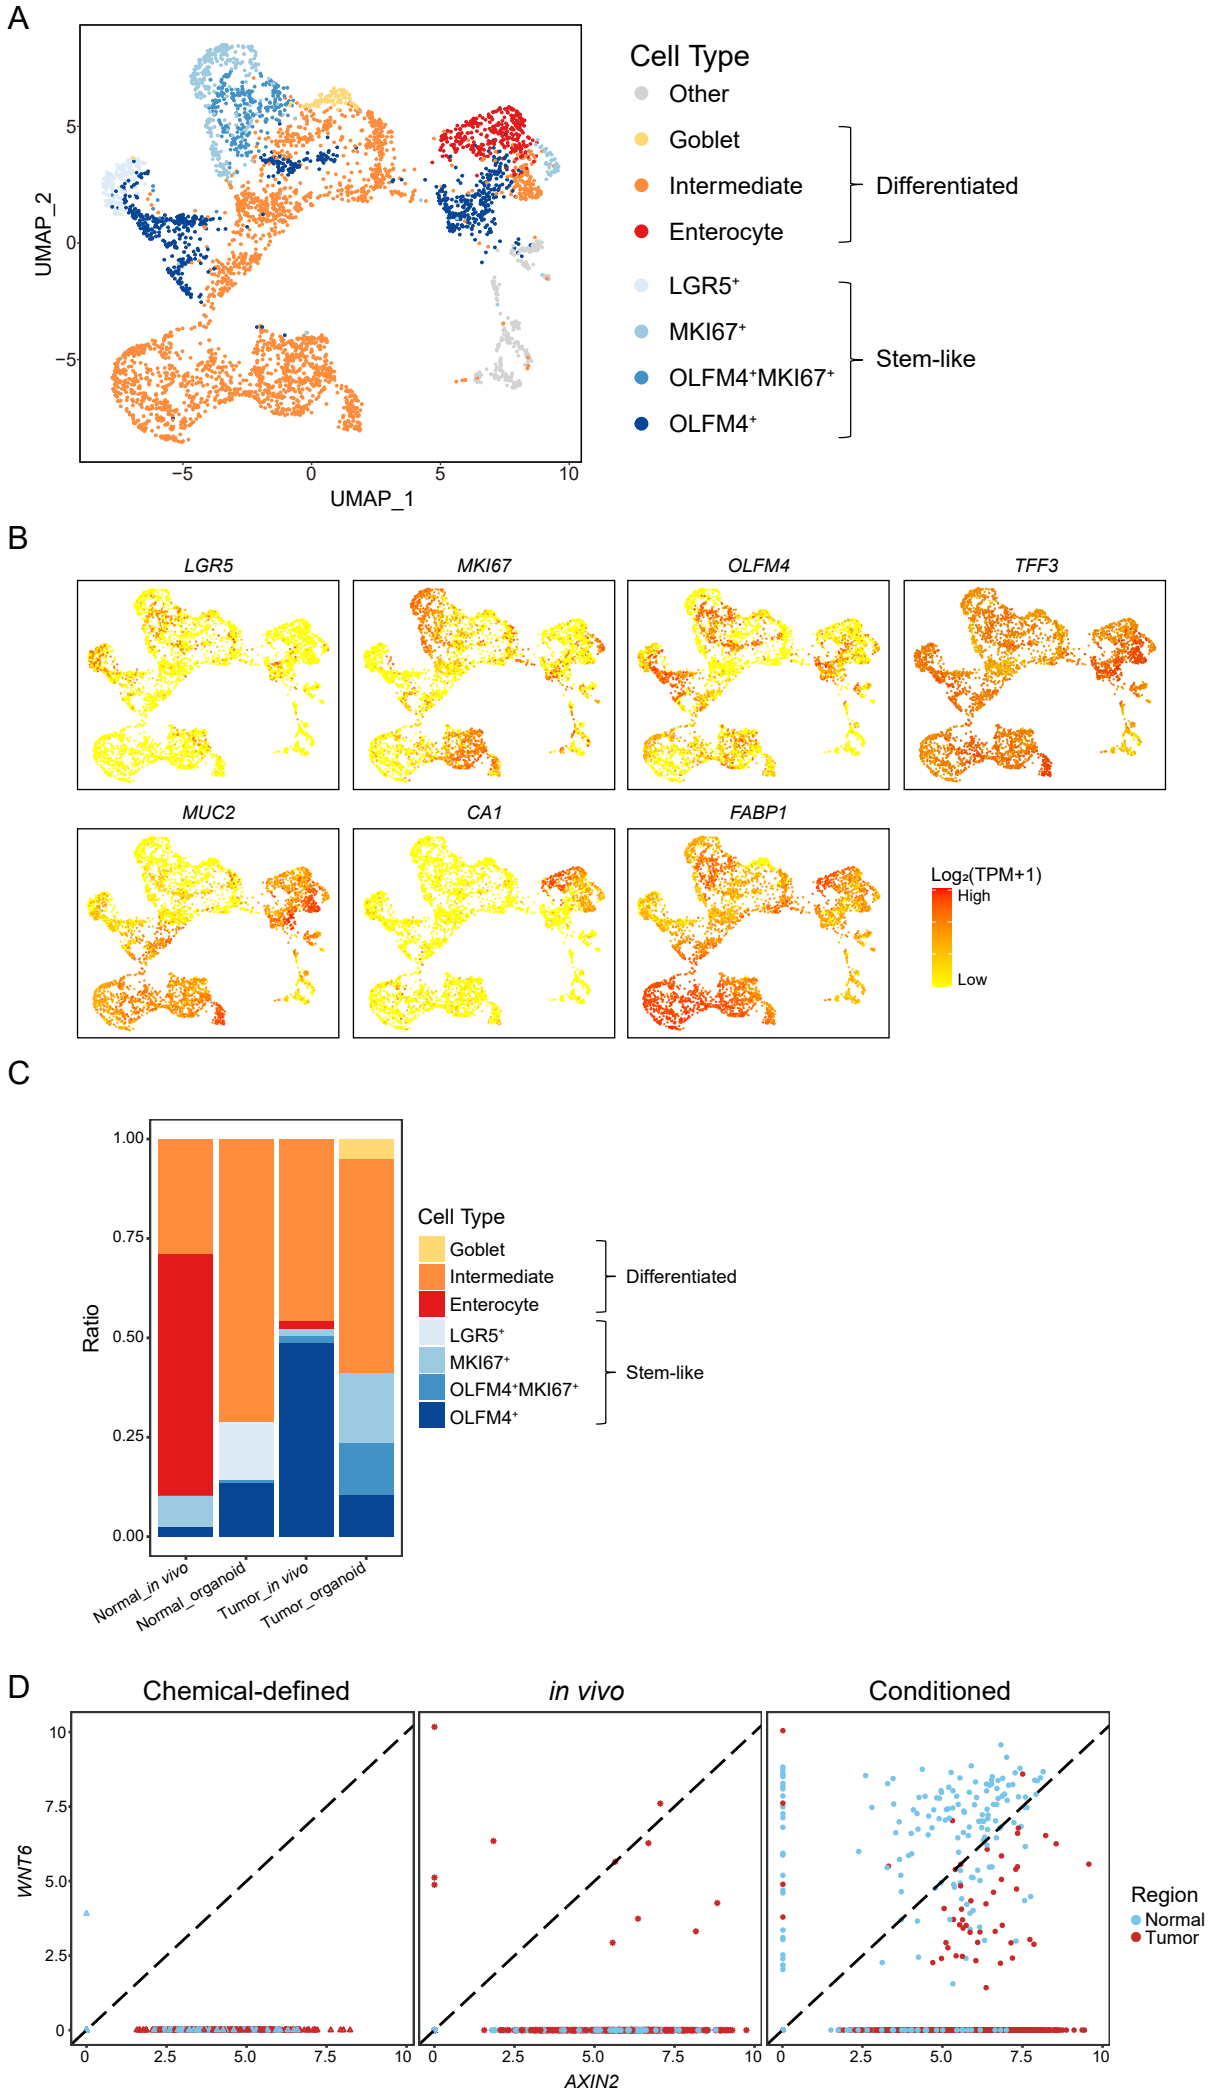



**Fig. S2 Tumor organoid cells and normal organoid cells that were cultured in conditioned medium express different WNT signaling pathway target genes.**

- (A) UMAP clustering of cells and colors represent epithelial subtypes.
- (B) Expression patterns of intestinal cell type markers were projected onto the UMAP plot. The colors from yellow to red represent expression levels from low to high. *OLFM4* and *LGR5*, intestinal stem/pluripotent cell markers; *MKI67*, cell proliferative marker; *CA1* and *FABP1*, enterocyte markers; *MUC2* and *TFF3*, goblet cell markers. Basic information of these cell type markers can be found in Supplementary Table S3.
- (C) Bar plot showing the distribution of epithelial subtypes in different conditions.
- (D) Scatterplot showing the expression patterns of the WNT signaling pathway target genes *WNT6* and *ANXIN2* in each individual cell. Different colors represent cells collected from normal or tumor regions.

Fig. S3

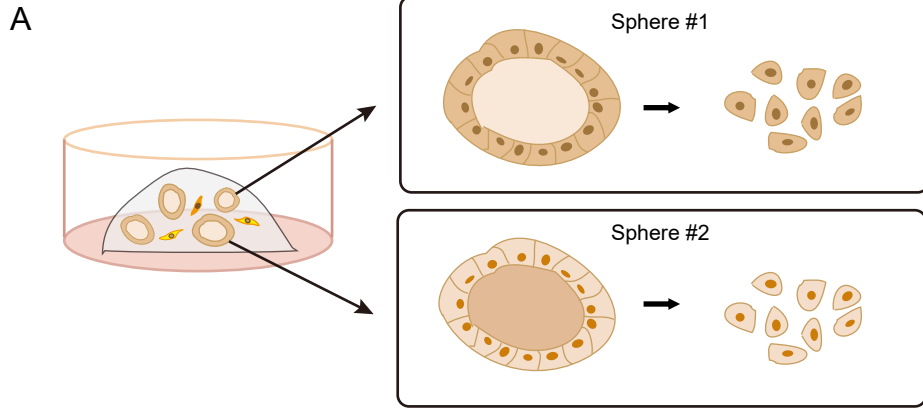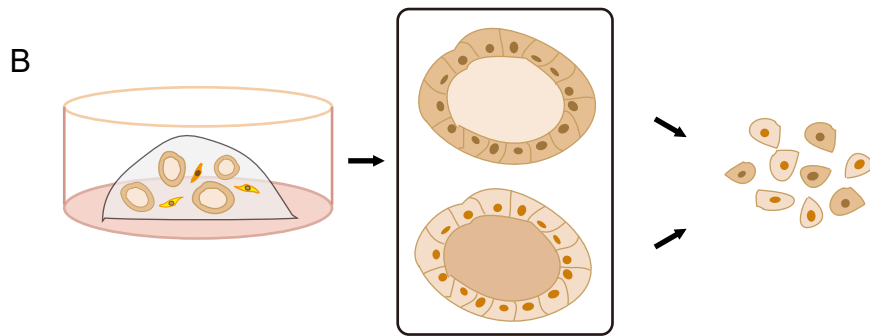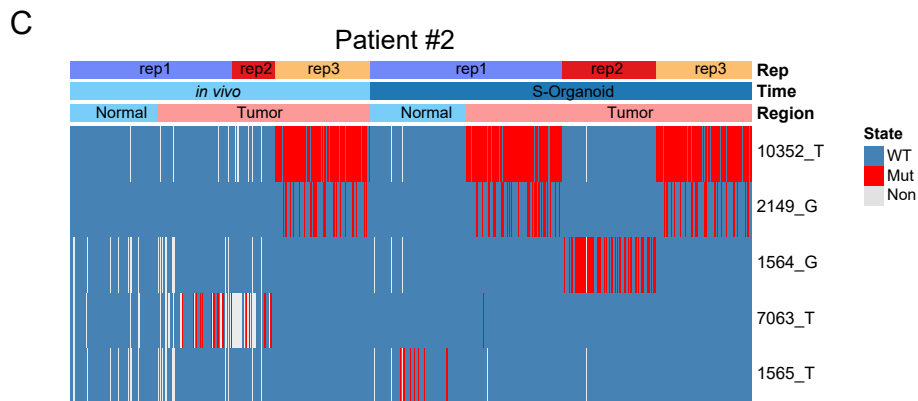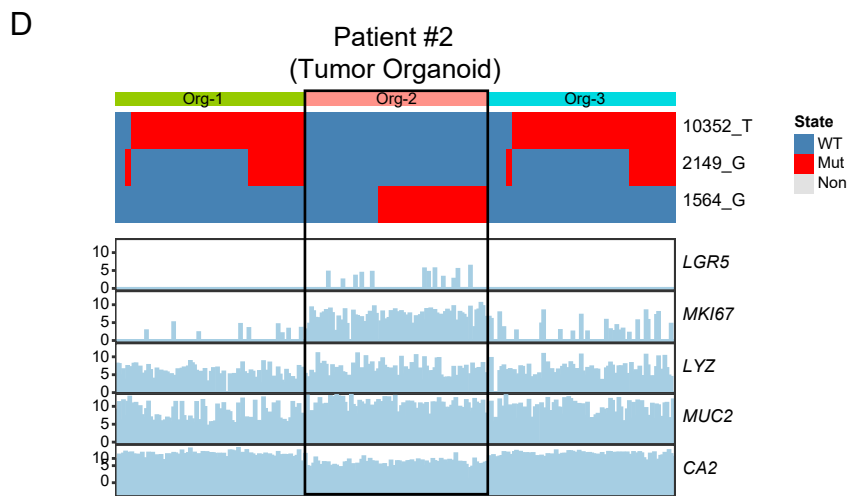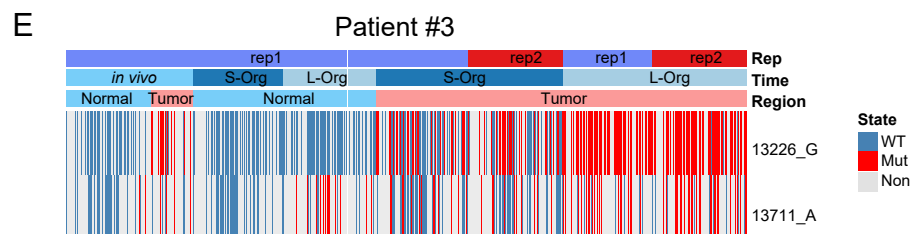

**Fig. S3 Mitochondrial mutations of patients #2 and #3.**

- (A) Schematic diagram showing single cell picking strategies of patient #1 and #2 for *in vitro* cultured organoids.
- (B) Schematic diagram showing single cell picking strategies of other patients for *in vitro* cultured organoids.
- (C) Heatmap showing mitochondrial mutation of patient #2 (P2). Red represents mutant site, blue represents wild type and grey represents site with reads lower than 9. Chem, chemical-defined medium; Cond, conditioned medium.
- (D) Heatmap showing the mitochondrial mutations in tumor organoid cells of patient #2 that cultured in chemical-defined medium. Cells of three single organoid spheres were showed. Bar plot showing the corresponding expression levels of intestinal cell type markers. *OLFM4*, pluripotent cell marker; *MKI67*, cell proliferation marker; *LYZ*, Paneth cell marker; *MUC2*, goblet cell marker; *CA2*, enterocyte marker
- (E) Heatmap showing mitochondrial mutation of patient #3. Red represents mutant site, blue represents wild type and grey represents site with reads lower than 9. Chem, chemical-defined medium; Cond, conditioned medium.

Fig. S4

A

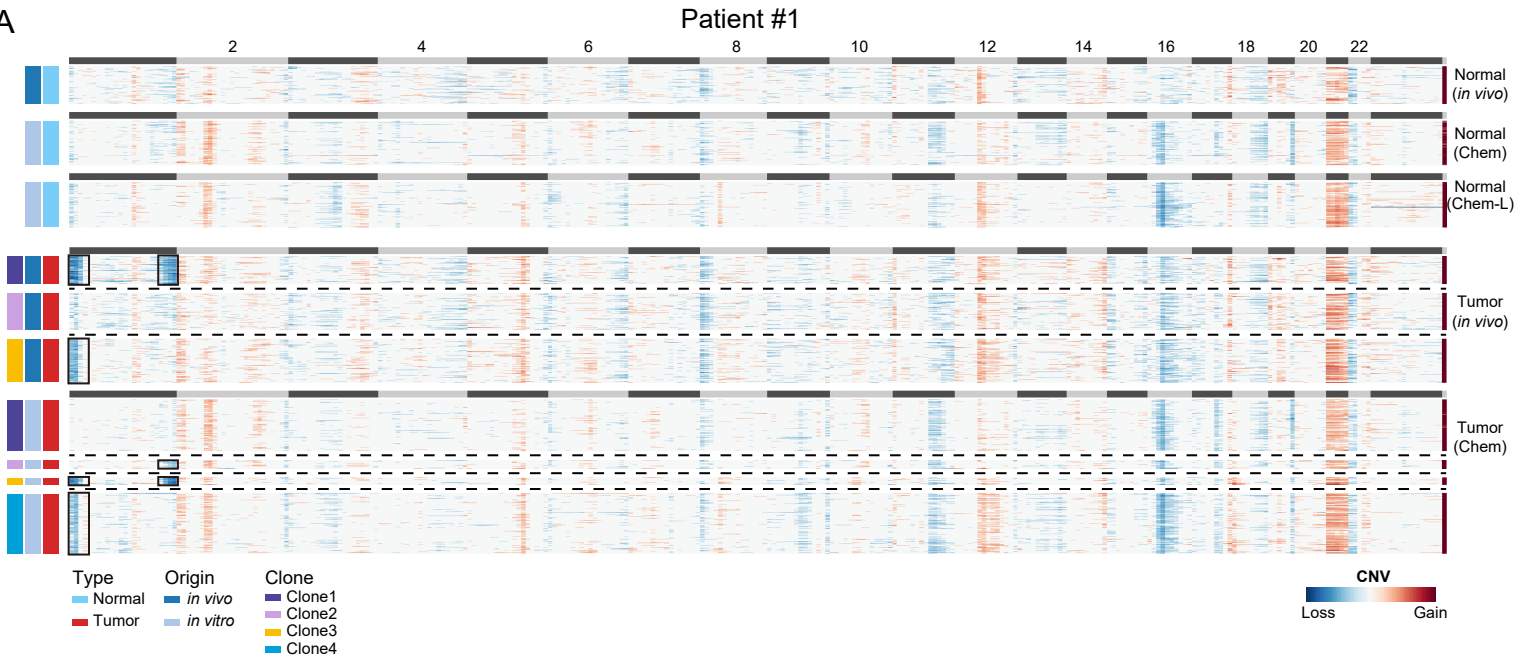

B

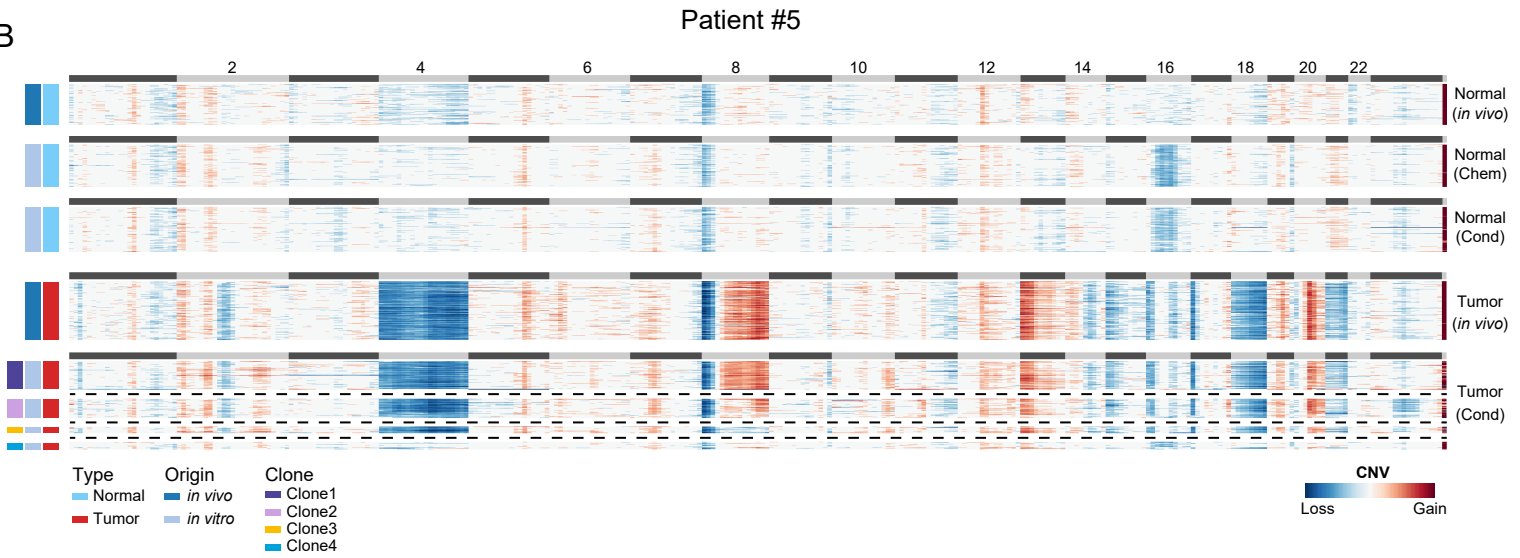

C

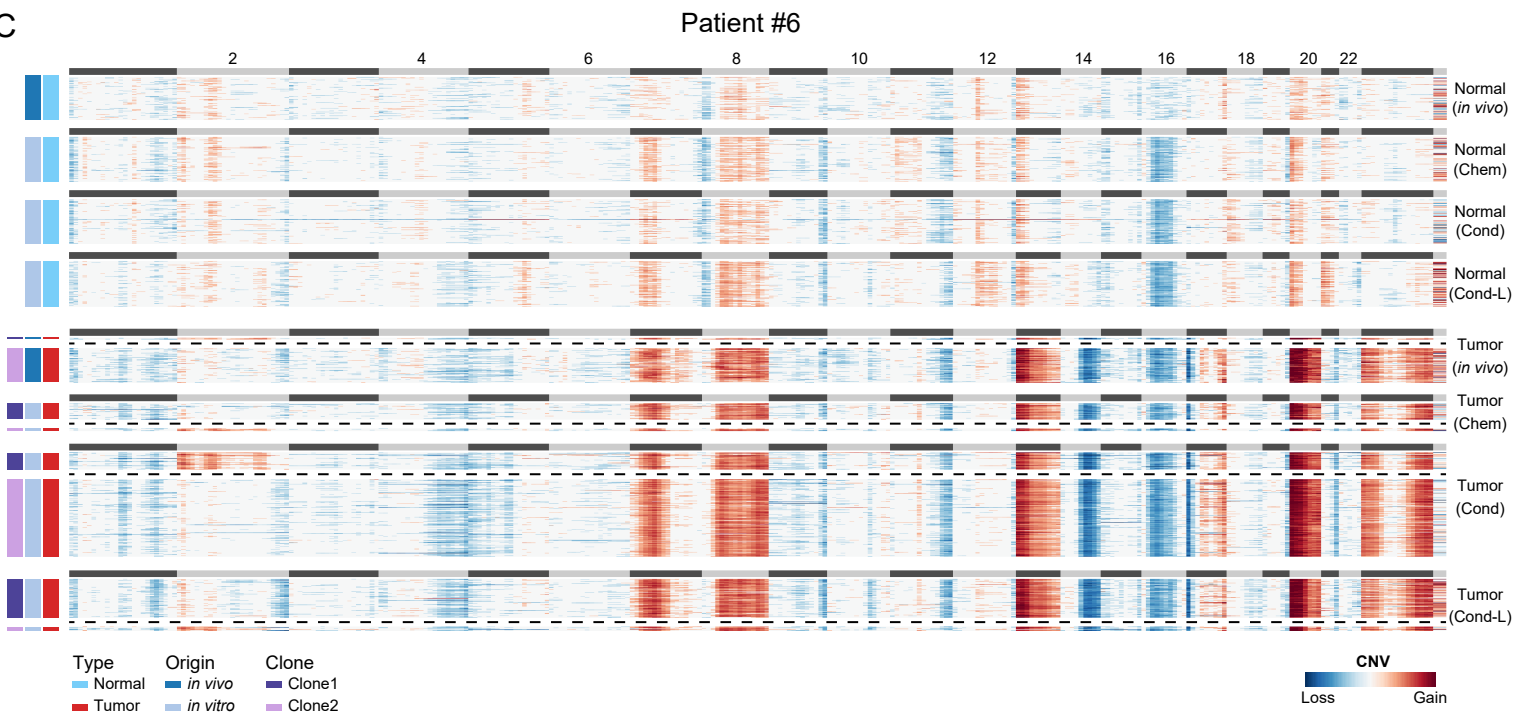

**Fig. S4 Copy number variations of patient #1, #5 and #6 that were inferred by scRNA-Seq data.**

- (A) CNV patterns of *in vivo* and *in vitro* cultured tumor cells of patient #1 (P1). Blue, deletion. White, normal. Red, amplification. There were three and four subclones were identified for tumor cells *in vivo* and *in vitro* respectively. We clustered the cells based on their CNV patterns, and we defined cells possessing different CNVs as distinct clones.
- (B) CNV patterns of *in vivo* and *in vitro* cultured tumor cells of patient #5 (P5). Blue, deletion. White, normal. Red, amplification. There were four subclones were identified for tumor cells *in vitro*.
- (C) CNV patterns of *in vivo* and *in vitro* cultured tumor cells of patient #6 (P6). Blue, deletion. White, normal. Red, amplification. Two subclones were identified for both *in vivo* and *in vitro* tumor cells.

Fig. S5

A

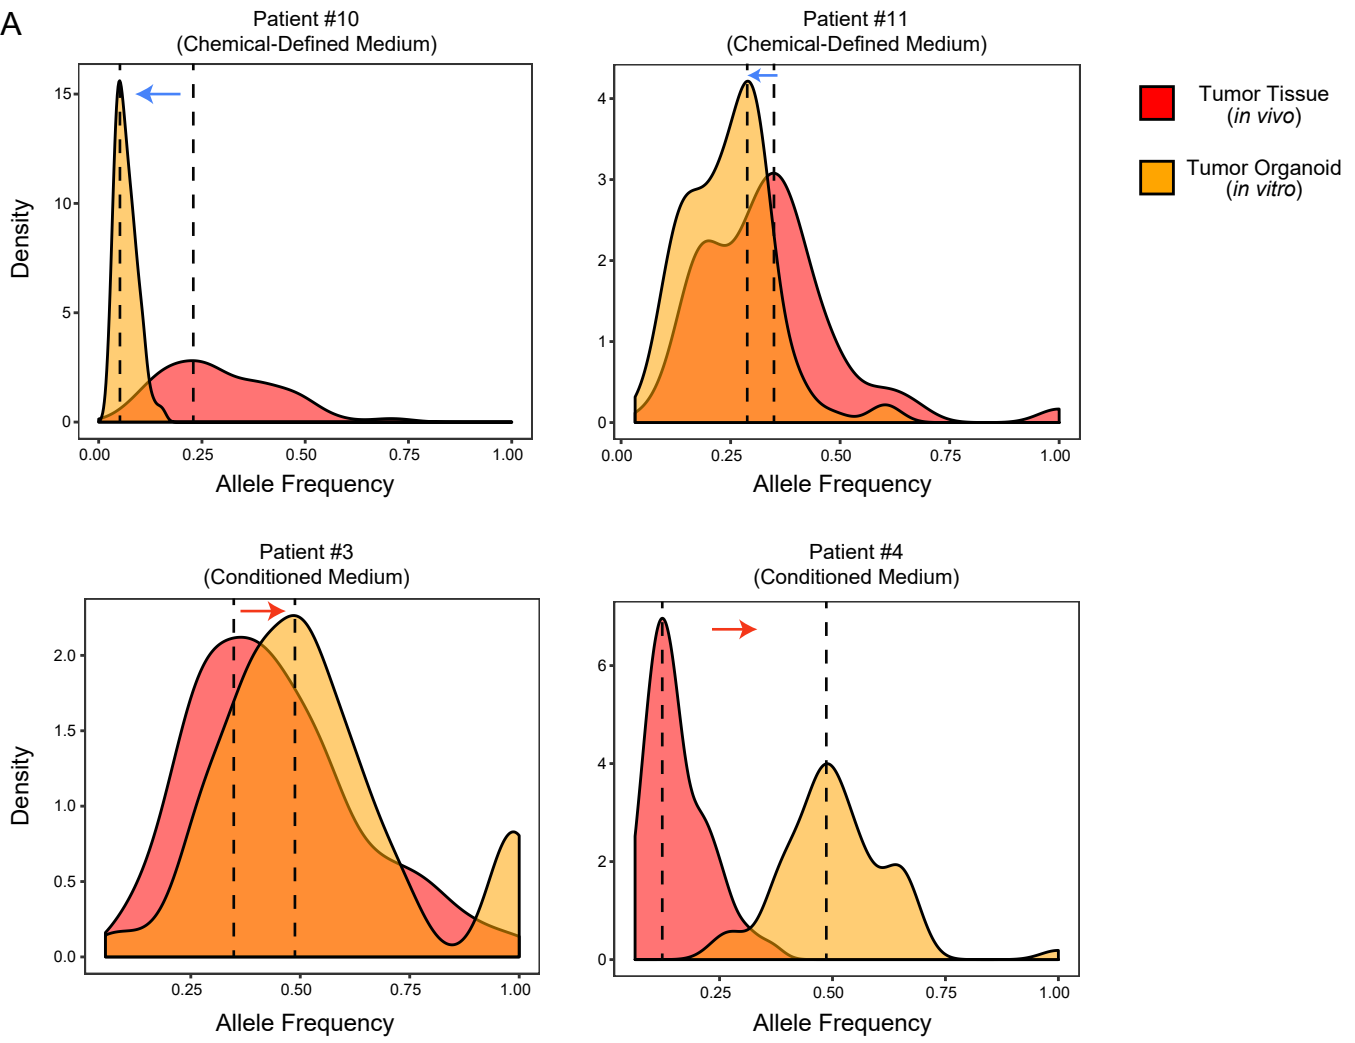

**Fig. S5 Whole exome sequencing of organoids that were cultured in chemical-defined and conditioned media.**

(A) Density plot showing the allele frequency of somatic mutations that shared by in vivo and in vitro tumor cells. Tumor organoids of patient #10 and #11 (P10 and P10) were cultured in chemical-defined medium, while tumor organoids of patient #3 and #4 were cultured in conditioned medium.

Fig. S6

A

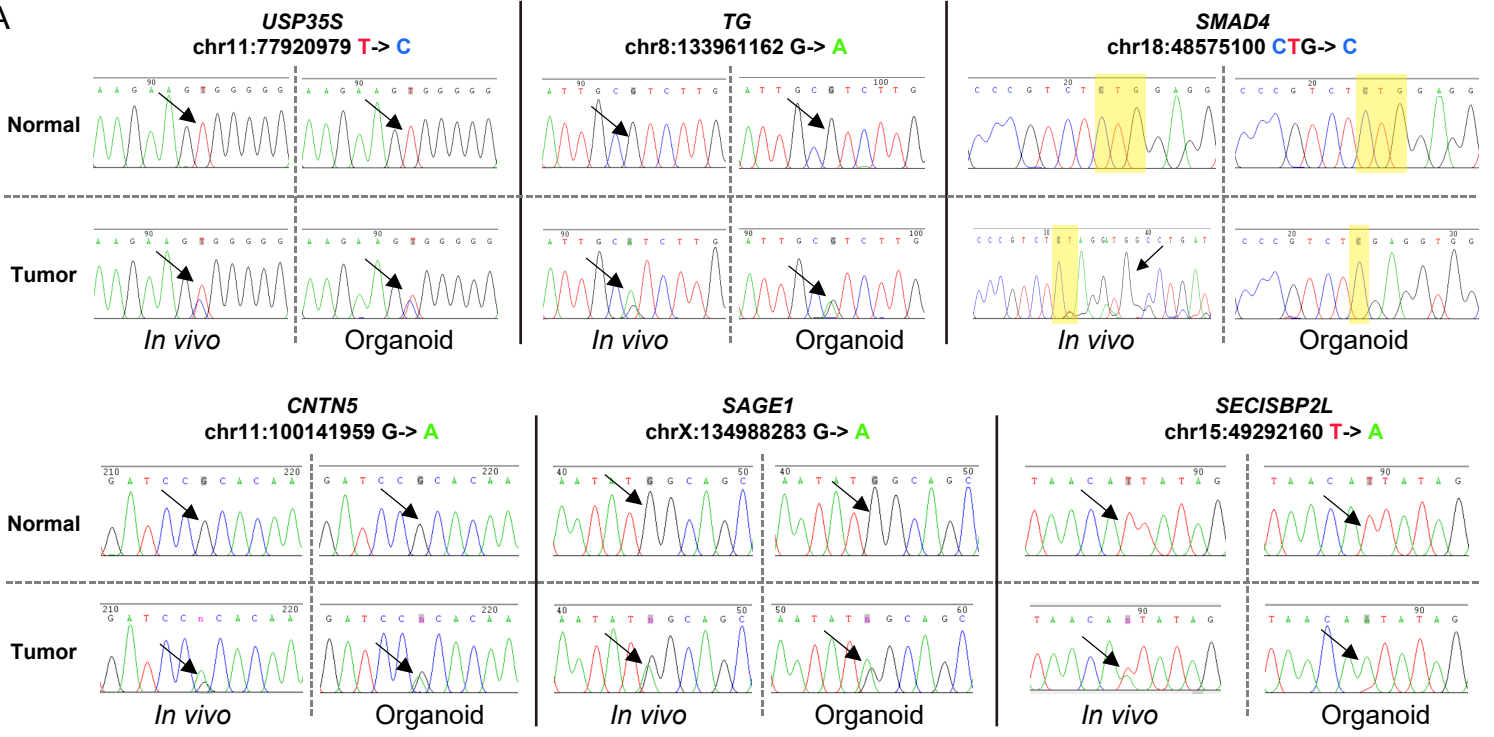

B

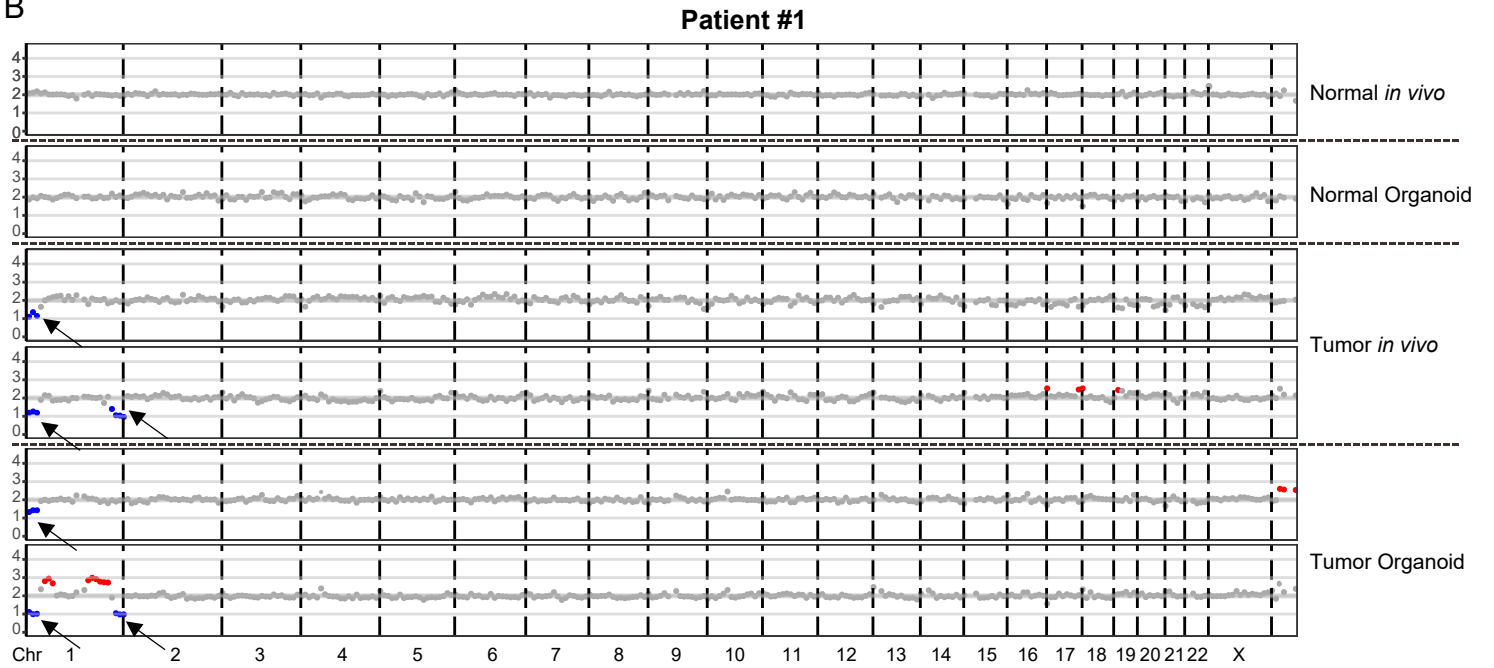



**Fig. S6 *In vitro* cultured organoids can maintain *in vivo* point mutations and CNVs of cancer cells.**

- (A) Point mutation verification of six mutation sites for patient #1 *in vivo* tissues and derived organoids by Sanger sequencing. Arrows indicate the sites of mutation.
- (B) Bulk whole genome sequencing (WGS) of *in vivo* and *in vitro* tumor cells and normal cells for patient #1. Blue, deletion. Red, amplification. Arrows indicate the CNV site.

Fig S7

Patient #8

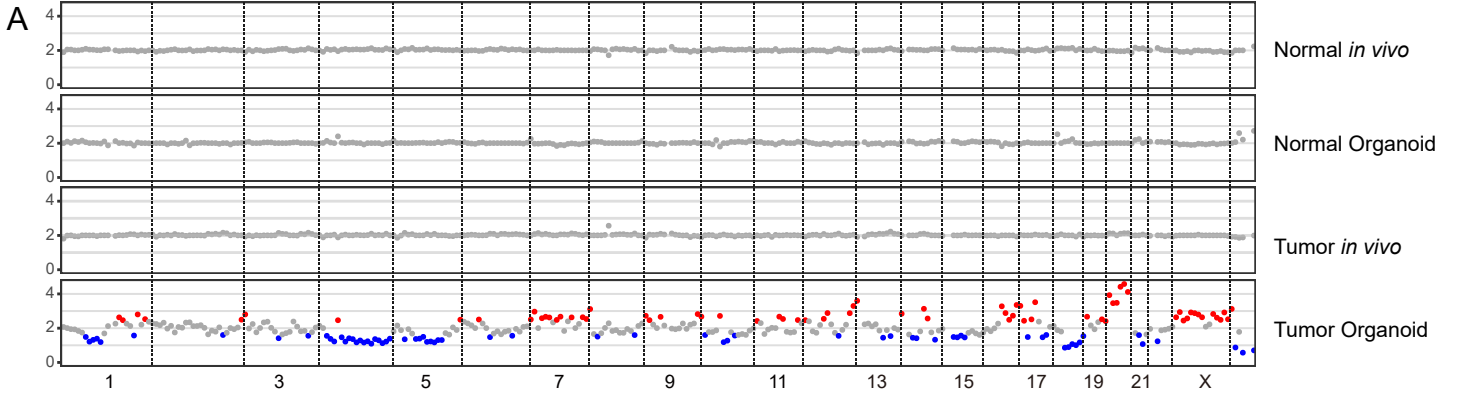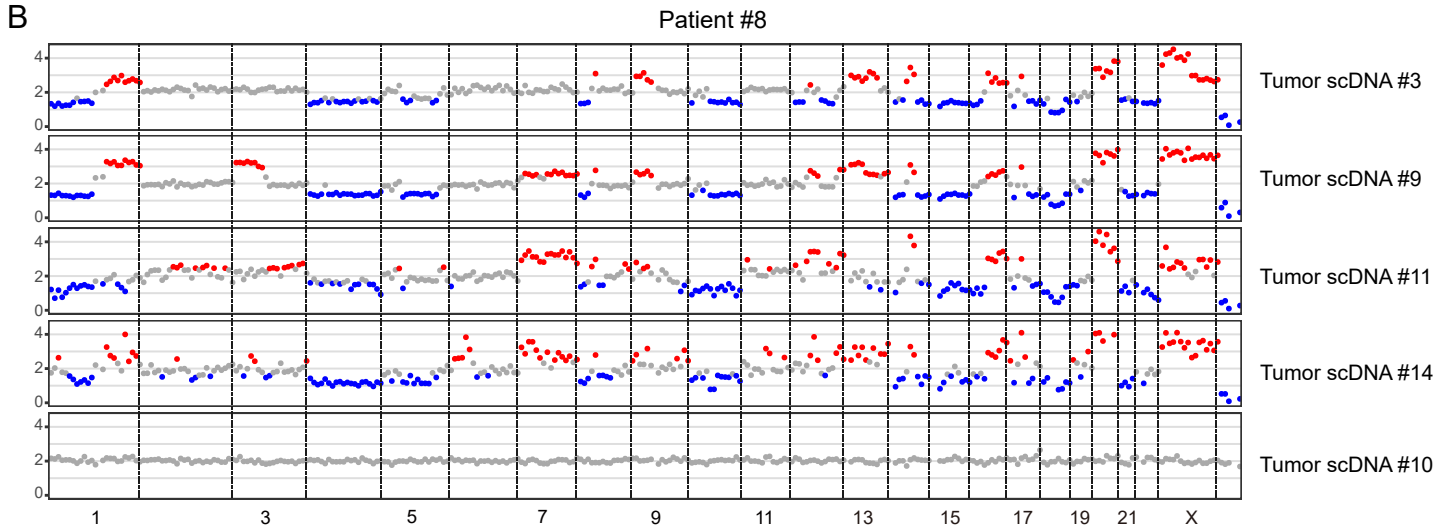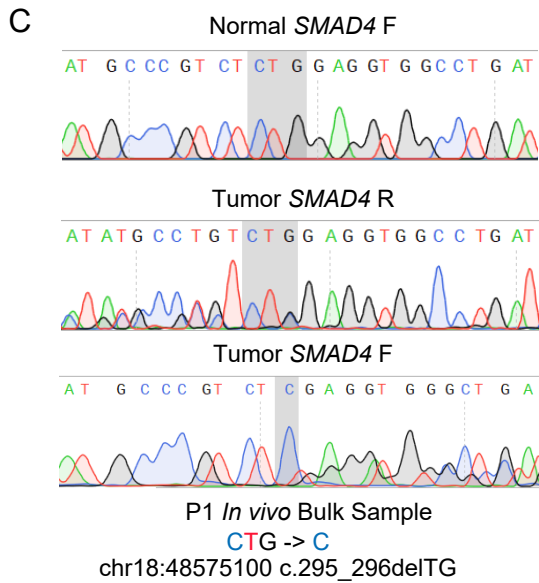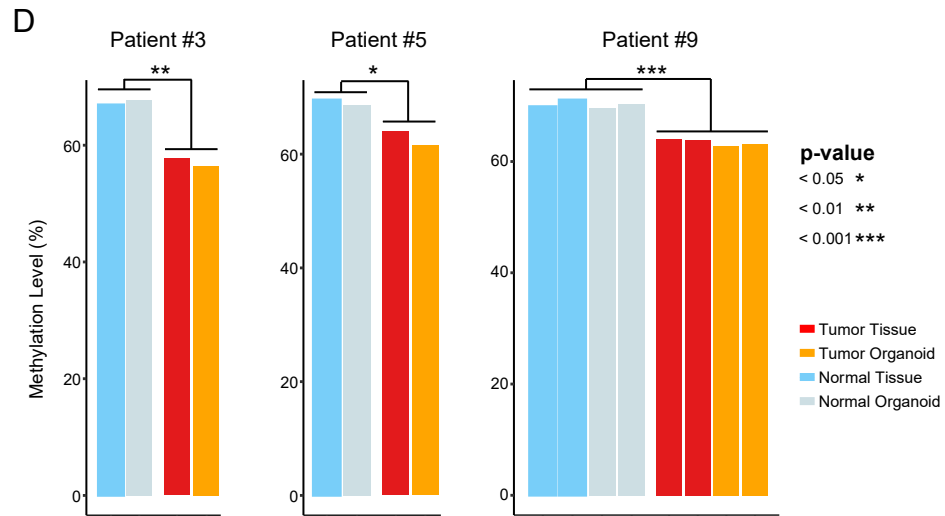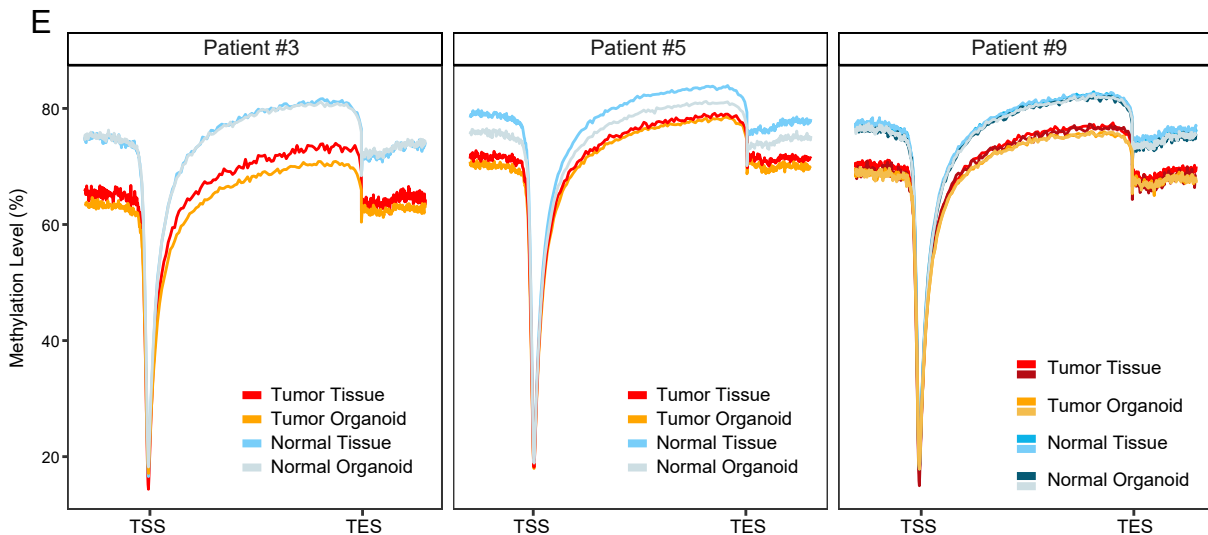

**Fig. S7 Cultured organoids tend to enrich for specific molecular features.**

- (A) CNVs of patient #8 at bulk levels for magnetic-activated cell sorting (MACS)-enriched EPCAM<sup>+</sup> tumor epithelial cells and adjacent normal cells as well as derived organoid cultures.
- (B) CNVs of patient #8 at the single-cell level for tumor epithelial cells *in vivo*. In total, we sequenced 20 cells and other cells we not showed exhibited similar pattern as cell #10.
- (C) Point mutation verification of *SMAD4* for patient #1 *in vivo* tissues and derived organoids by Sanger sequencing.
- (D) Bar plot showing the global DNA methylation ratio of *in vivo* and *in vitro* cultured tumor cells and normal cells. All organoids of these patients were constructed in conditioned medium.
- (E) Line plot showing the DNA methylation ration around transcriptional start site (TSS), gene body and transcriptional end site (TES). The x axis represents the relative position of genes and y axis represents the average DNA methylation levels. Different color represents cells with different origins. It reflects that the organoids cultured *in vitro* maintained the global DNA methylation signatures of corresponding cells *in vivo*. *In vivo* normal tissues and *in vitro* normal tissue-derived organoids have similar DNA methylation profiles, and the methylation levels are higher than both *in vivo* tumor cells and *in vitro* tumor-derived organoids as expected.

Fig. S8

A

Patient #4

Medium 1 3 5 7 9 11 13 15 17 19 21 X

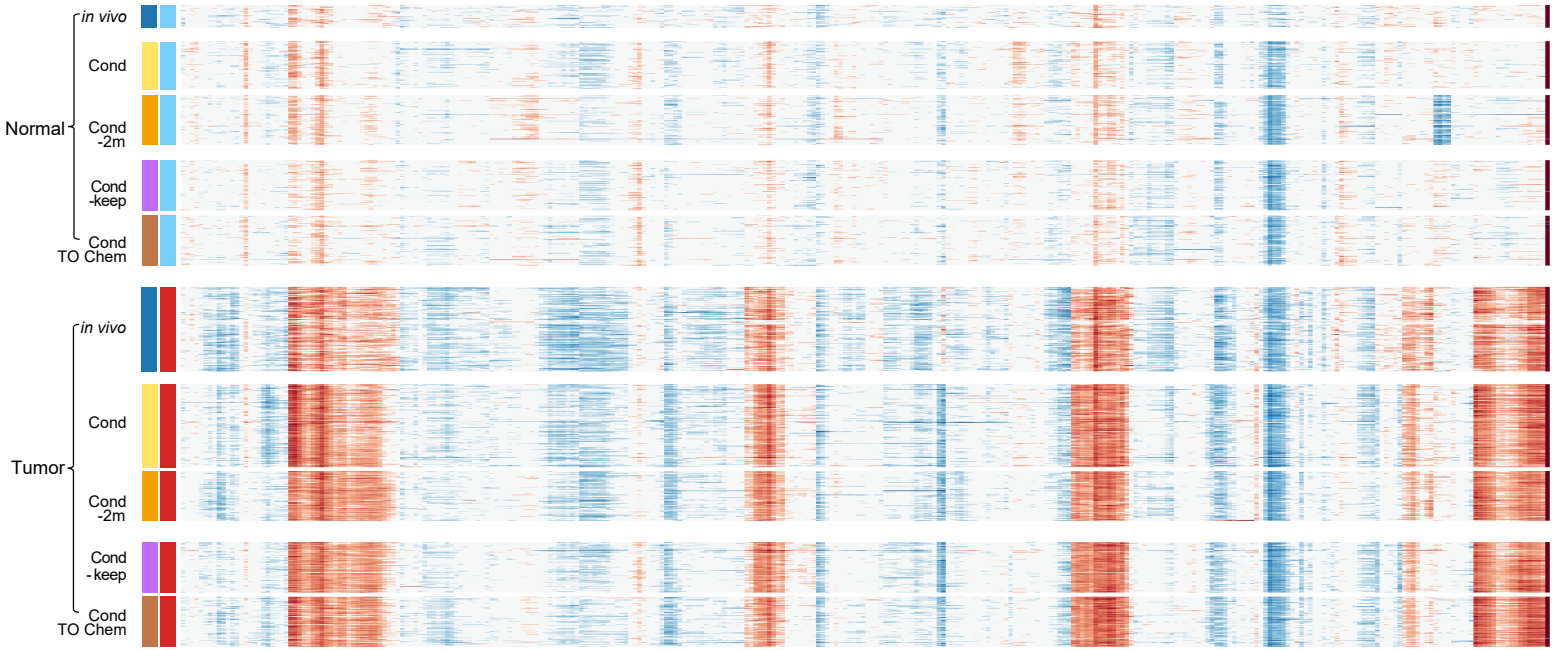

B

Patient #7

Medium 1 3 5 7 9 11 13 15 17 19 21 X

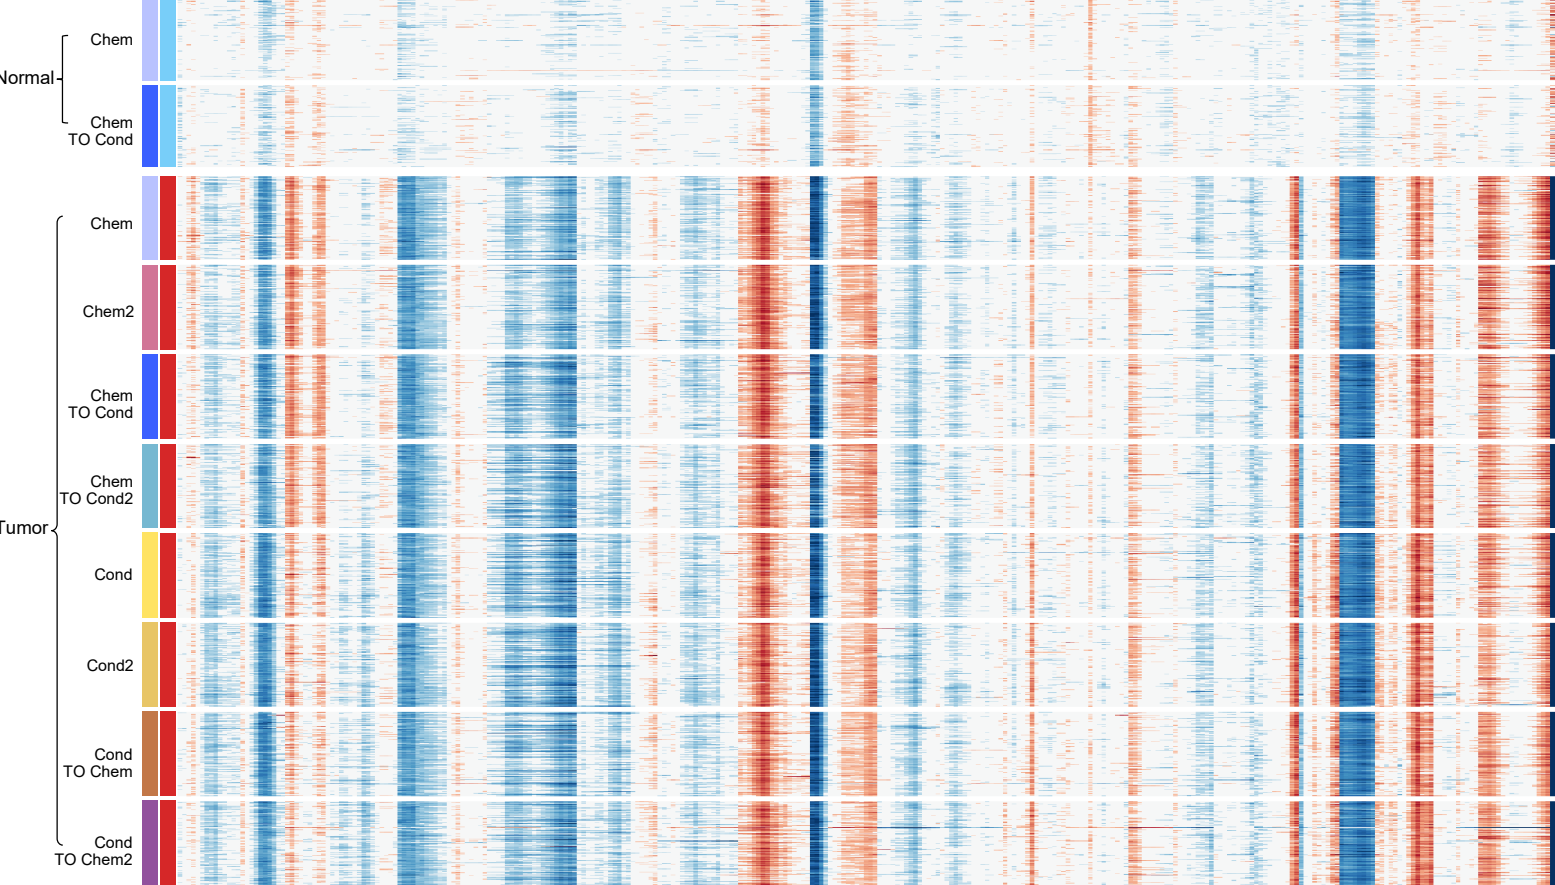

**Fig. S8 Copy number variations of patient #4 and #7 that were inferred by scRNA-Seq data.**

- (A) CNV patterns of *in vivo* and *in vitro* cultured tumor cells and normal cells of patient #4. Blue, deletion. White, normal. Red, amplification.
- (B) CNV patterns of *in vivo* and *in vitro* cultured tumor cells and normal cells of patient #7. Blue, deletion. White, normal. Red, amplification.
